# Correction: Current Working Models of SMC-driven DNA-loop extrusion

**Kyoung-Wook Moon and Je-Kyung Ryu**

Department of Physics and Astronomy, Seoul National University, 1 Gwanak-ro, Gwanak-gu, Seoul 08826, South Korea

The authors of the original article “Current working models of SMC-driven DNA-loop extrusion” (doi: 10.1042/BST20220898) would like to correct the funding stated in the Acknowledgements section of the article, which should instead read:

J.-K.R. acknowledges the Institute of Applied Physics of Seoul National University, Creative-Pioneering Researchers Program through Seoul National University, the Brain Korea 21 Four Project grant funded by the Korean Ministry of Education, Samsung Electronics Co., Ltd. (Project Number IO220811-01964-01), and the National Research Foundation of Korea (NRF) grant funded by the Korea government (MSIT) (Project Number RS-2023-00212694, RS-2023-00265412, RS-2023-00218318).

Downloaded from [http://port.silverchair.com/biochemsoctrans/article-pdf/51/6/2189/952790/bst-2022-0898c\\_cor.pdf](http://port.silverchair.com/biochemsoctrans/article-pdf/51/6/2189/952790/bst-2022-0898c_cor.pdf) by guest on 13 March 2024

Correction published:  
2 November 2023
